# Supplementary material for: Metal doped titanate photo catalysts for the mineralization of congo red under visible irradiation
Source: Royal Society of Chemistry journal article supplement (doi:10.1039/c4ra14722g), 2014-12-24
Supplement: c4ra14722g1.pdf [file c4ra14722g1.pdf]

## Supporting Information

Table ESI1. Basic chemical information of congored

|                        |                                              |
|------------------------|----------------------------------------------|
| Common Name            | Congored                                     |
| Abbreviation           | CR                                           |
| Other name             | Direct red 28                                |
| Class                  | Azo                                          |
| Colour as solid        | Red-brown powder                             |
| Colour as solution     | Red-brown (basic medium), blue (acid medium) |
| Colour Index           | 22120                                        |
| Molecular Formula      | $C_{32}H_{22}N_6Na_2O_6S_2$                  |
| Molecular weight (g/L) | 696.66                                       |
| $\lambda$ max (nm)     | 497                                          |
| Structure              |                                              |

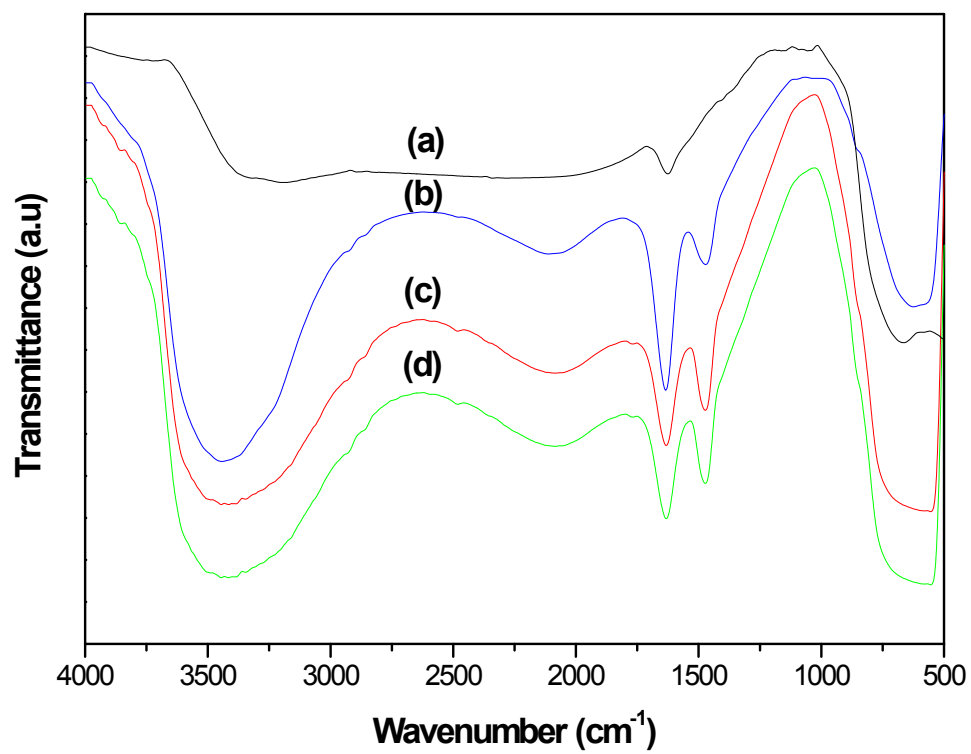

**Figure ESI1** FTIR spectra of (a) bare TiO<sub>2</sub>, (b) ST, (c) NiST and d) RuST

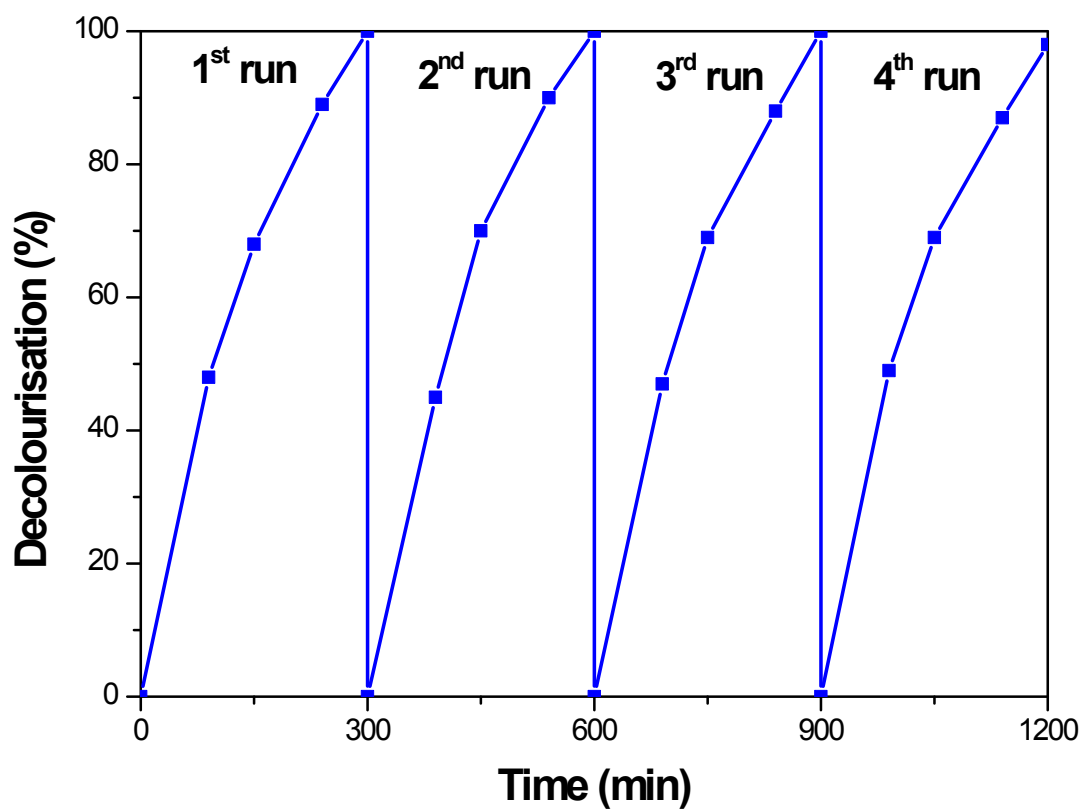

**Figure ESI2** Recyclability of NiST in the decolourisation of CR
